# Supplementary material
Source: publisher figshare collection journal article supplement (https://gsajournals.figshare.com/ndownloader/files/26606786)
Supplement: Supplementary file 1 [file 26606786]

## Sheet: Table S3
Table S4. dMOV10 targets identified by TRIBE
	Upregulated genes (log2 fold change >1, p.adjst <0.05) in mRNA-seq are hilighted in blue
	Downregulated genes (log2 fold change <-1, p.adjst <0.05) in mRNA-seq are hilighted in green
	Genes not identified in mRNA-seq are hilighted in orange
Gene ID	Gene Symbol
FBgn0000077	amx
FBgn0000257	car
FBgn0000259	CkIIbeta
FBgn0000289	cg
FBgn0000319	Chc
FBgn0000330	cm
FBgn0000473	Cyp6a2
FBgn0000562	egl
FBgn0000709	fliI
FBgn0001123	Galphas
FBgn0001189	hfw
FBgn0001218	Hsc70-3
FBgn0001258	ImpL3
FBgn0001978	stc
FBgn0002121	l(2)gl
FBgn0002641	mal
FBgn0002921	Atpalpha
FBgn0003053	peb
FBgn0003079	Raf
FBgn0003139	PpV
FBgn0003301	rut
FBgn0003475	spir
FBgn0003656	sws
FBgn0004169	up
FBgn0004227	nonA
FBgn0004407	DNApol-gamma35
FBgn0004432	Cyp1
FBgn0004463	RpIII128
FBgn0010269	Dsor1
FBgn0010415	Sdc
FBgn0010470	Fkbp14
FBgn0010583	dock
FBgn0011202	dia
FBgn0011300	babo
FBgn0011305	Rsf1
FBgn0011586	e(r)
FBgn0011642	Zyx
FBgn0011742	Arp2
FBgn0011754	PhKgamma
FBgn0011760	ctp
FBgn0011770	Gip
FBgn0011826	Pp2B-14D
FBgn0013995	Calx
FBgn0015247	Diap2
FBgn0015336	CG15865
FBgn0015527	peng
FBgn0015791	Rab14
FBgn0015903	apt
FBgn0015949	hrg
FBgn0016041	Tom40
FBgn0016687	Nurf-38
FBgn0016694	Pdp1
FBgn0017581	Lk6
FBgn0019960	Mitofilin
FBgn0020307	dve
FBgn0020309	crol
FBgn0020381	Dredd
FBgn0020440	Fak
FBgn0020493	Dad
FBgn0020496	CtBP
FBgn0020618	Rack1
FBgn0020767	Spred
FBgn0022160	Gpo-1
FBgn0022710	Ac13E
FBgn0023094	cyc
FBgn0023129	aay
FBgn0023177	Pp4-19C
FBgn0023216	Parg
FBgn0023388	Dap160
FBgn0023458	Rbcn-3A
FBgn0024182	waw
FBgn0024238	Fim
FBgn0024244	drm
FBgn0024251	bbx
FBgn0024807	DIP1
FBgn0024947	NTPase
FBgn0025381	rush
FBgn0025456	CREG
FBgn0025463	Bap60
FBgn0025633	CG13366
FBgn0025790	TBPH
FBgn0025864	Crag
FBgn0026015	Top3beta
FBgn0026060	Mipp2
FBgn0026086	Adar
FBgn0026143	CDC45L
FBgn0026181	Rok
FBgn0026192	par-6
FBgn0026250	eIF1A
FBgn0026323	Tak1
FBgn0026369	Sara
FBgn0026372	RpL23A
FBgn0026879	CG13364
FBgn0027087	HisRS
FBgn0027108	Inx2
FBgn0027291	l(1)G0156
FBgn0027329	CCT6
FBgn0027335	Rip11
FBgn0027342	fz4
FBgn0027453	Dnz1
FBgn0027505	Rab3-GAP
FBgn0027528	goe
FBgn0027529	tapas
FBgn0027556	CG4928
FBgn0027588	GCS2alpha
FBgn0027621	Pfrx
FBgn0027844	CAH1
FBgn0028327	l(1)G0320
FBgn0028331	l(1)G0289
FBgn0028515	EndoGI
FBgn0028836	CSN7
FBgn0028982	Spt6
FBgn0028983	Spn55B
FBgn0029093	cathD
FBgn0029504	CHES-1-like
FBgn0029688	lva
FBgn0029693	CG6379
FBgn0029715	CG11444
FBgn0029762	NAAT1
FBgn0029828	CG6067
FBgn0029831	CG5966
FBgn0029840	raptor
FBgn0029843	Nep1
FBgn0029849	Efr
FBgn0029854	CG3566
FBgn0029867	CG3847
FBgn0029870	Marf
FBgn0029873	CG3918
FBgn0029881	pigs
FBgn0029906	xit
FBgn0029932	CG4607
FBgn0030060	CG2004
FBgn0030063	CG1789
FBgn0030073	CG10962
FBgn0030183	CG15309
FBgn0030189	CG2909
FBgn0030234	CG15211
FBgn0030289	GCS1
FBgn0030300	Sk1
FBgn0030318	rho-4
FBgn0030320	CG2247
FBgn0030329	prtp
FBgn0030336	CG1578
FBgn0030342	CG10347
FBgn0030347	CG15739
FBgn0030396	CG2556
FBgn0030407	CG2543
FBgn0030431	CG4407
FBgn0030502	tth
FBgn0030503	Tango2
FBgn0030510	CG12177
FBgn0030520	Pdcd4
FBgn0030521	CtsB1
FBgn0030530	jub
FBgn0030581	CG14408
FBgn0030593	CG9512
FBgn0030640	CG6294
FBgn0030641	CG6299
FBgn0030685	Graf
FBgn0030720	CG8939
FBgn0030731	Mfe2
FBgn0030735	CG3632
FBgn0030743	CG9921
FBgn0030746	CG9981
FBgn0030747	CG4301
FBgn0030748	Traf-like
FBgn0030752	CG9947
FBgn0030753	rngo
FBgn0030756	CG9903
FBgn0030775	CG9673
FBgn0030776	CG4653
FBgn0030778	CG4678
FBgn0030788	Sap30
FBgn0030790	CG4768
FBgn0030799	CG4872
FBgn0030802	DENR
FBgn0030803	CG4880
FBgn0030808	RhoGAP15B
FBgn0030809	Ubr1
FBgn0030816	CG16700
FBgn0030817	CG4991
FBgn0030836	CG8664
FBgn0030838	CG5445
FBgn0030850	stas
FBgn0030858	IntS2
FBgn0030869	Socs16D
FBgn0030872	Ucp4A
FBgn0030890	CG7536
FBgn0030891	Ada3
FBgn0030893	RhoGAP16F
FBgn0030928	CG15044
FBgn0030929	CG15043
FBgn0030966	CG7280
FBgn0030991	CG7453
FBgn0030993	Mec2
FBgn0031012	CG8051
FBgn0031020	Naa15-16
FBgn0031023	CG14200
FBgn0031047	Rcd-1
FBgn0031048	CG12237
FBgn0031057	Ubqn
FBgn0031069	Pmp70
FBgn0031090	Rab35
FBgn0031115	CG11710
FBgn0031118	RhoGAP19D
FBgn0031126	Cyp6v1
FBgn0031127	CG1835
FBgn0031141	CG1304
FBgn0031265	CG2794
FBgn0031266	Sf3b1
FBgn0031360	CG31937
FBgn0031361	CG17652
FBgn0031428	CG9886
FBgn0031432	Cyp309a1
FBgn0031449	CG31689
FBgn0031453	Bacc
FBgn0031571	bark
FBgn0031579	CG15422
FBgn0031739	CG14005
FBgn0031842	Tango1
FBgn0031860	CG11236
FBgn0031896	CG4502
FBgn0031904	CG5149
FBgn0031914	CG5973
FBgn0031930	CG7025
FBgn0032156	CG13124
FBgn0032400	CG6770
FBgn0032456	MRP
FBgn0032684	CG10178
FBgn0032733	CG15170
FBgn0032796	CG10188
FBgn0032839	CG10659
FBgn0032846	CG10721
FBgn0032938	CG8671
FBgn0032979	Clamp
FBgn0033117	CG3358
FBgn0033127	Tsp42Ef
FBgn0033194	Vps13
FBgn0033205	CG2064
FBgn0033222	CG12824
FBgn0033232	CG12159
FBgn0033236	CG14764
FBgn0033241	CG2915
FBgn0033315	beta3GalTII
FBgn0033316	CG14749
FBgn0033539	Git
FBgn0033540	Elp2
FBgn0033570	ND-B14
FBgn0033579	CG13229
FBgn0033581	CG12391
FBgn0033699	RpS11
FBgn0033739	Dyb
FBgn0033766	CG8771
FBgn0033789	CG13324
FBgn0033879	CG6543
FBgn0033912	RpS23
FBgn0033926	Arc1
FBgn0033998	row
FBgn0034062	CG8388
FBgn0034072	Dg
FBgn0034083	lbk
FBgn0034113	CG8060
FBgn0034289	CG10910
FBgn0034292	CG5767
FBgn0034335	GstE1
FBgn0034418	CG15118
FBgn0034419	CG15111
FBgn0034432	CG7461
FBgn0034611	MFS16
FBgn0034612	CG10505
FBgn0034629	Acox57D-d
FBgn0034644	CG10082
FBgn0034694	CG6613
FBgn0034697	GM130
FBgn0034808	CG9896
FBgn0034897	Sesn
FBgn0035237	CG13917
FBgn0035282	CNMa
FBgn0035619	CG10592
FBgn0035620	CG5150
FBgn0035807	CG7492
FBgn0035917	Zasp66
FBgn0036192	Pldn
FBgn0036505	CG7945
FBgn0036727	CG7589
FBgn0037360	CG2182
FBgn0037659	Kdm2
FBgn0038302	CG4210
FBgn0038702	CG3739
FBgn0039006	Cyp6d4
FBgn0039163	CG5515
FBgn0039777	Jon99Fii
FBgn0039849	CG11334
FBgn0039993	CG17691
FBgn0040010	CG17493
FBgn0040011	Slmap
FBgn0040069	vanin-like
FBgn0040234	c12.2
FBgn0040235	c12.1
FBgn0040236	c11.1
FBgn0040262	Ugt36Ba
FBgn0040319	Gclc
FBgn0040339	MED22
FBgn0040375	CG13760
FBgn0040513	kappaB-Ras
FBgn0040850	CG15210
FBgn0040918	schlank
FBgn0040942	CG12643
FBgn0041092	tai
FBgn0041775	tral
FBgn0041789	Pax
FBgn0042092	CG13773
FBgn0043001	Chrac-16
FBgn0043576	PGRP-SC1a
FBgn0043796	CG12219
FBgn0043903	dome
FBgn0046706	Haspin
FBgn0050011	gem
FBgn0050094	CG30094
FBgn0050100	CG30100
FBgn0050269	CG30269
FBgn0050273	CG30273
FBgn0050381	PIG-X
FBgn0050497	CG30497
FBgn0050503	CG30503
FBgn0051075	CG31075
FBgn0051712	CG31712
FBgn0051793	CG31793
FBgn0051855	CG31855
FBgn0051901	Mur29B
FBgn0051992	gw
FBgn0052280	CG32280
FBgn0052485	CG32485
FBgn0052512	CG32512
FBgn0052536	CG32536
FBgn0052626	AMPdeam
FBgn0052649	CG32649
FBgn0052654	Sec16
FBgn0052685	ZAP3
FBgn0052750	CG32750
FBgn0052751	CG32751
FBgn0052773	CR32773
FBgn0053080	CG33080
FBgn0063485	Lasp
FBgn0064115	GatC
FBgn0065032	Arpc3B
FBgn0067102	GlcT-1
FBgn0085229	CG34200
FBgn0085358	Diedel3
FBgn0085415	CG34386
FBgn0085421	Epac
FBgn0085437	CG34408
FBgn0085446	CG34417
FBgn0085451	htk
FBgn0085771	28SrRNA-Psi:CR40741
FBgn0085819	28SrRNA-Psi:CR41609
FBgn0086445	l(2)37Cd
FBgn0086450	su(r)
FBgn0250788	beta-Spec
FBgn0250869	CG42240
FBgn0259176	bun
FBgn0259214	PMCA
FBgn0259221	CG42321
FBgn0259718	CG42372
FBgn0259923	Sep4
FBgn0260439	Pp2A-29B
FBgn0260748	CG5004
FBgn0260938	tay
FBgn0260986	mei-38
FBgn0261113	Xrp1
FBgn0261553	CG42671
FBgn0261573	CoRest
FBgn0261599	RpS29
FBgn0261671	tweek
FBgn0261791	SNRPG
FBgn0261802	CG42748
FBgn0261862	whd
FBgn0261955	kdn
FBgn0262108	CR42861
FBgn0262475	bru2
FBgn0262734	eIF4H1
FBgn0262886	CR43241
FBgn0263077	CG43340
FBgn0263258	chas
FBgn0263593	Lpin
FBgn0263852	Dad1
FBgn0264384	CR43836
FBgn0264489	CG43897
FBgn0264490	Eip93F
FBgn0264605	CG43954
FBgn0265052	St3
FBgn0265137	Spn42Da
FBgn0265297	pAbp
FBgn0265356	tn
FBgn0265434	zip
FBgn0265598	Bx
FBgn0266199	CR44894
FBgn0266268	FeCH
FBgn0266284	Ns3
FBgn0266446	CG45076
FBgn0266526	CG45093
FBgn0267164	CR45604
FBgn0267821	da
FBgn0283473	S6KL
FBgn0283741	prage
FBgn0284235	CG46319
FBgn0285910	VhaAC39-1
FBgn0285926	Imp
